# Supplementary material for: Plant-Growth Promotion and Biocontrol Properties of Three Streptomyces spp. Isolates to Control Bacterial Rice Pathogens
Source: Front Microbiol. 2019 Feb 25;10:290. doi: 10.3389/fmicb.2019.00290 (PMC6398372; doi:10.3389/fmicb.2019.00290)
Supplement: Table S1 — Microbial strains and primers used in this study. [file Table_1.docx]

**Supplementary Table 1. Microbial strains and primers used in this study.**

| | **STRAIN** | **CHARACTERISTICS** | **SOURCE** | | --- | --- | --- | | **BACTERIAL STRAINS** |  |  | | ***Streptomyces strains*** |  |  | | *Streptomyces* A20 | Rice rhizosphere isolate | This study | | *Streptomyces* 5.1 | Rice rhizosphere isolate | This study | | *Streptomyces* 7.1 | Rice rhizosphere isolate | This study | | **BACTERIAL STRAINS FOR ANTIMICROBIAL ASSAYS** |  |  | | *Acidovorax avenae* 4008-2 | Rice pathogen | CIAT (Unpublished) | | *Acinetobacter baumannii*  ATCC 19606 | Human pathogen | ATCC | | *Bacillus* sp*. C636* | Native strain | IBUN strain collection | | *Bacillus subtilis* ATCC 21556 | Commercial strain | ATCC | | *Burkholderia glumae* 320012 | Phytopathogen | CIAT (Unpublished) | | *Burkholderia. glumae* CIAT 4026 | Phytopathogen | CIAT (Unpublished) | | *Burkholderia glumae* AU6208 | Clinical isolate | (Weinberg et al., 2007) | | *Burkholderia gladioli* CIAT 3704-1 | Rice pathogen | CIAT (Unpublished) | | *B. gladioli* CIAT 3962 | Rice pathogen | CIAT (Unpublished) | | *Chromobacterium violaceum* ATCC 31532 | Commercial strain | ATCC | | *Enterobacter aerogenes* 7ARG | Commercial strain | IBUN strain collection | | *Escherichia coli DH5α* | Commercial strain | GIBCO-BBL Life Technologies | | *Escherichia coli* ATCC 23724 | Commercial strain | ATCC | | *Escherichia coli* ATCC 25922 | Commercial strain | ATCC | | *Klebsiella pneumoniae* ATCC 700603 | Multi-resistant strain | ATCC | | *Pseudomonas putida* F117 pKRC12 | QS-Biosensor strain | (Riedel et al., 2001) | | *Pseudomonas aeruginosa* ATCC 27853 | Commercial strain | ATCC | | *Pseudomonas fuscovaginae* CIAT 3638-19 | Phytopathogen | CIAT (Unpublished) | | *Pseudomonas. fuscovaginae* CIAT 3668π3 | Phytopathogen | CIAT (Unpublished) | | *Pseudomonas fuscovaginae* UPB0736 | Phytopathogen | (Mattiuzzo et al., 2010) | | *Staphylococcus aureus* ATCC 25923 | Human pathogen | ATCC | | **FUNGAL STRAINS** |  |  | | *Colletotrichum* sp. *24C* (FIF024) | Yam pathogen | Yam research group – IBUN | | *Colletotrichum* sp. *26B* | Yam pathogen | Yam research group – IBUN | | *Fusarium* sp*. DC9 (*FIF025) | Yam pathogen | Yam research group – IBUN | | *Fusarium* sp. *DC 13B* | Yam pathogen | Yam research group – IBUN | | *Fusarium oxysporum* | Clover pathogen | Group study plant metabolic activities.  Department of Chemistry UNAL | | *Gaeumannomyces* sp*.* (FPR010) | Rice pathogen | Yam research group – IBUN | | *Penicillium janthinellum* FP010 | Native strain | (Scervino et al., 2010) | | *Phomopsis* sp*.*DC1B (FIF027) | Yam pathogen | Yam research group – IBUN | | *Rhizoctonia solani* (FPR011) | Rice pathogen | Yam research group – IBUN | | *Ullocladium* sp*.* 29E (FIF023) | Yam pathogen | Yam research group – IBUN | | **PLANT GROWTH PROMOTING STRAINS** |  |  | | *Azospirillum brasilense* AZPP010 | Plant Growth Promoting Strain | (Moreno and Rojas, 2008) | | *Azotobacter chroccoccum* AZFN010 | Growth Promoting Strain | (Moreno, 2011) |  | **Locus** | **Primer** | **Sequence (5´🡪 3´)** | **Reference** | | --- | --- | --- | --- | | 16S | 16SA | CCGTCGACGAGCTCAGAGTTTGATCCTGGCTCAG | (Cui et al., 2001) | | 16S | 16SB | CCCGGGTACCAAGCTTAAGGAGGTGATCCAGCCGCA | | *gyrB* | gyrBPF  gyrBPR | GAGGTCGTGCTGACCGTGCTGCACGCGGGCGGCAAGTTCGGC  GTTGATGTGCTGGCCGTCGACGTCGGCGTCCGCCAT | (Guo et al., 2008) | | *atpD* | atpDPF  atpDPR | GTCGGCGACTTCACCAAGGGCAAGGTGTTCAACACC  GTGAACTGCTTGGCGACGTGGGTGTTCTGGGACAGGAA | | *recA* | recAPF  recAPR | CCGCRCTCGCACAGATTGAACGSCAATTC  GCSAGGTCGGGGTTGTCCTTSAGGAAGTTGCG | | *trpB* | trpBPF trpBPR | GCGCGAGGACCTGAACCACACCGGCTCACACAAGATCAACA  TCGATGGCCGGGATGATGCCCTCGGTGCGCGACAGCAGGC | | *rpoB* | rpoBPF  rpoBPR | GAGCGCATGACCACCCAGGACGTCGAGGC  CCTCGTAGTTGTGACCCTCCCACGGCATGA | |  |  |
| --- | --- | --- | --- | --- | --- | --- | --- | --- | --- | --- | --- | --- | --- | --- | --- | --- | --- | --- | --- | --- | --- | --- | --- | --- | --- | --- | --- | --- | --- | --- | --- | --- | --- | --- | --- | --- | --- | --- | --- | --- | --- | --- | --- | --- | --- | --- | --- | --- | --- | --- | --- | --- | --- | --- | --- | --- | --- | --- | --- | --- | --- | --- | --- | --- | --- | --- | --- | --- | --- | --- | --- | --- | --- | --- | --- | --- | --- | --- | --- | --- | --- | --- | --- | --- | --- | --- | --- | --- | --- | --- | --- | --- | --- | --- | --- | --- | --- | --- | --- | --- | --- | --- | --- | --- | --- | --- | --- | --- | --- | --- | --- | --- | --- | --- | --- | --- | --- | --- | --- | --- | --- | --- | --- | --- | --- | --- | --- | --- | --- | --- | --- | --- | --- | --- | --- | --- | --- | --- | --- | --- | --- | --- | --- | --- | --- | --- | --- | --- | --- | --- | --- | --- | --- | --- | --- |
